# Supplementary material
Source: PubMed Central journal article supplement (PMC7457147)
Supplement: NIHMS1614139-supplement-Supplemental_figure_1.pdf [file NIHMS1614139-supplement-Supplemental_figure_1.pdf]

## ITGB6

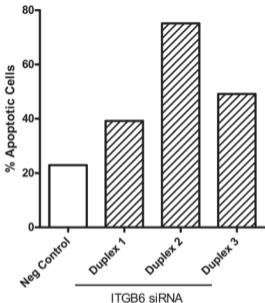

### Supplementary Figure 1.

Flow cytometry analysis of active caspase 3 in MPANC96 pancreatic cell lines, three days after transfections with 25nM of ITGB6 siRNA or negative control siRNA.
